# Supplementary material
Source: Elsevier journal article supplement (https://www.sciencedirect.com/science/article/pii/S0210569120301674)

## MATERIAL SUPLEMENTARIO

**Figura 1.** Algoritmo SVB+DEA adaptado a COVID-19.

### ALGORITMO SVB + DEA ADAPTADO A SITUACIÓN COVID-19

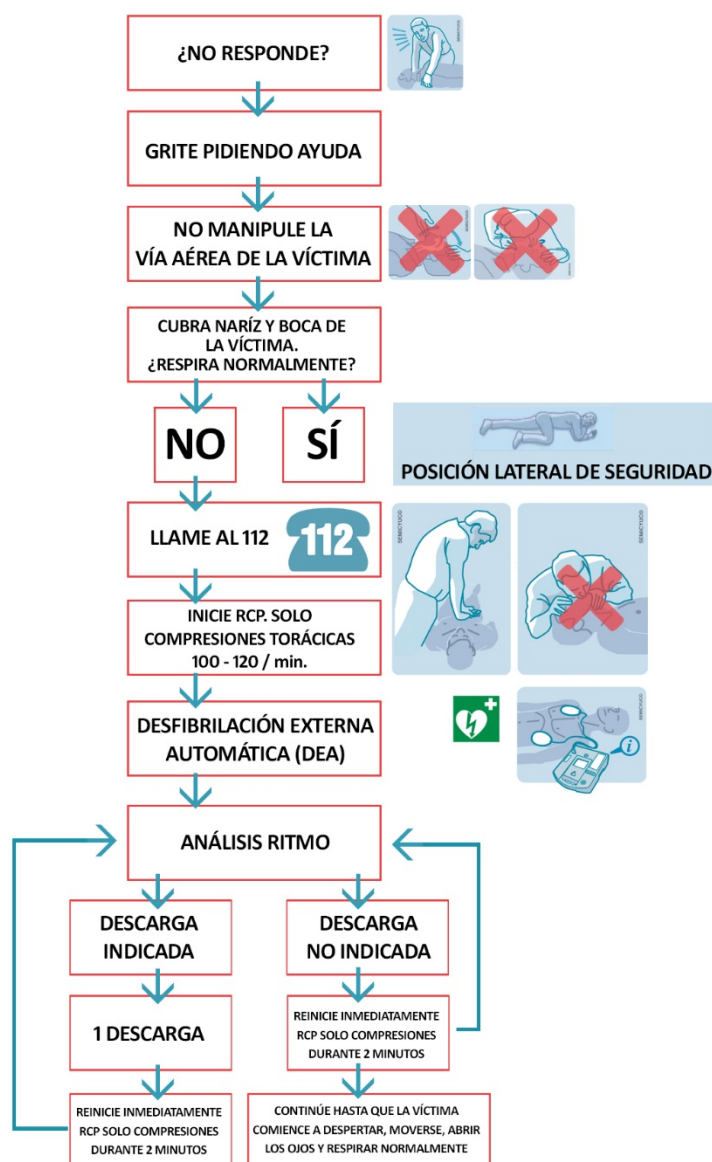

**Figura 2.** Aproximación D-ABCDE.

| VALORACIÓN INTRAHOSPITALARIA DEL PACIENTE CON INFECCIÓN SOSPECHADA O CONFIRMADA POR COVID-19<br>PROTOCOLO D - ABCDE |                         |                                                                                                                                                                                                                                                                                                                                                                                                                                |                                                       |
|---------------------------------------------------------------------------------------------------------------------|-------------------------|--------------------------------------------------------------------------------------------------------------------------------------------------------------------------------------------------------------------------------------------------------------------------------------------------------------------------------------------------------------------------------------------------------------------------------|-------------------------------------------------------|
| PROBLEMA                                                                                                            |                         | EVALUACIÓN                                                                                                                                                                                                                                                                                                                                                                                                                     | MEDIDAS                                               |
| <b>D</b>                                                                                                            | <b>Danger</b>           | <ul style="list-style-type: none"> <li>- Protección ante la exposición.</li> <li>- Análisis del entorno.</li> </ul>                                                                                                                                                                                                                                                                                                            | EPI                                                   |
| <b>A</b>                                                                                                            | <b>Vía aérea</b>        | <ul style="list-style-type: none"> <li>- Comprobar la permeabilidad pidiendo al paciente que hable.</li> <li>- Evaluar esfuerzo y ruidos respiratorios sin contacto estrecho con la vía aérea del enfermo (inspección, palpación).</li> <li>- No realizar la maniobra 'ver-oír-sentir'.</li> </ul>                                                                                                                             | Considerar vía aérea instrumentalizada <sup>1</sup> . |
| <b>B</b>                                                                                                            | <b>Respiración</b>      | <ul style="list-style-type: none"> <li>- Comprobar las características de la respiración (profundidad, simetría, frecuencia...) mediante inspección, palpación o auscultación.</li> <li>- Medir SatO<sub>2</sub><sup>2</sup>.</li> </ul>                                                                                                                                                                                       | Oxigenación<br>Ventilación<br>Evacuación pleural      |
| <b>C</b>                                                                                                            | <b>Circulación</b>      | <ul style="list-style-type: none"> <li>- Comprobar pulso y perfusión (color y temperatura de la piel, sudoración, relleno capilar, confusión, oliguria).</li> <li>- Monitorización de frecuencia y ritmo cardíaco y presión arterial<sup>2</sup>.</li> <li>- Inspeccionar en busca de posibles puntos de sangrado.</li> <li>- Realizar ECG e investigar datos de síndrome coronario, TEP o miocarditis<sup>2</sup>.</li> </ul> | Acceso IV/ID<br>Fluidos moderados<br>Vasosíntesis     |
| <b>D</b>                                                                                                            | <b>Daño neurológico</b> | <ul style="list-style-type: none"> <li>- Comprobar nivel de conciencia (escalas AVDN o GCS).</li> <li>- Exploración de pupilar y focalidad neurológica.</li> <li>- Determinación de glucemia y potenciales sedantes.</li> </ul>                                                                                                                                                                                                | ABC<br>Tratamiento específico de la causa.            |
| <b>E</b>                                                                                                            | <b>Exploración</b>      | <ul style="list-style-type: none"> <li>- Completar la exploración física (lesiones cutáneas, signos TVP).</li> <li>- Análisis de circunstancias concomitantes (antecedentes, evolución clínica, medicación, intervenciones recientes...).</li> </ul>                                                                                                                                                                           | Ajuste de los tratamientos ABCD.                      |

1. Es recomendable que las maniobras de manejo de vía aérea se realicen bajo protección con EPI de alto riesgo.

2. Los dispositivos (fonendoscopios, pulsioxímetro, ECG...) deben ser de uso exclusivo del paciente o desinfectarse antes de su reutilización.

Figura 3. Aplicación aproximación D-ABCDE.

## VALORACIÓN INTRAHOSPITALARIA DEL PACIENTE CON INFECCIÓN SOSPECHADA O CONFIRMADA POR COVID-19 PROTOCOLO D - ABCDE

### APLICACIÓN DEL PROTOCOLO D - ABCDE

1. Protégase y evalúe los problemas por orden de prioridad (ABCDE), partiendo de una observación general del enfermo para hacerse con la impresión de gravedad.
2. Trate los problemas que supongan un riesgo vital antes de avanzar al siguiente paso.
3. Reconozca en qué problemas necesita ayuda y solicítela precozmente\*.
4. Tras una valoración completa, reevalúe con regularidad analizando el efecto de los tratamientos instaurados.
5. Recuerde que el objetivo de esta aproximación es detectar precozmente la gravedad y tratar los problemas que supongan un riesgo vital inminente, en vista a frenar el deterioro, evitar una PCR y ganar el tiempo necesario para que un equipo debidamente entrenado complete el diagnóstico y el tratamiento definitivo.

### \* CRITERIOS DE LLAMADA

| PARADA CARDÍACA O RESPIRATORIA |                                                                                                                                         |
|--------------------------------|-----------------------------------------------------------------------------------------------------------------------------------------|
| <b>A</b>                       | Vía aérea comprometida.                                                                                                                 |
| <b>B</b>                       | FR < 5 rpm<br>FR > 35 rpm<br>SatO2 < 90%                                                                                                |
| <b>C</b>                       | FC < 40 lpm<br>FC > 140 lpm<br>TAs < 90 mmHg                                                                                            |
| <b>D</b>                       | Descenso brusco del nivel de consciencia.<br>Disminución de la puntuación GCS más de 2 puntos.<br>Convulsiones repetidas o continuadas. |
| <b>E</b>                       | Deterioro clínico global, idealmente medido mediante escalas de gravedad o precoz (NEWS2).                                              |

Figura 4. Algoritmo SVA adaptado a COVID-19.

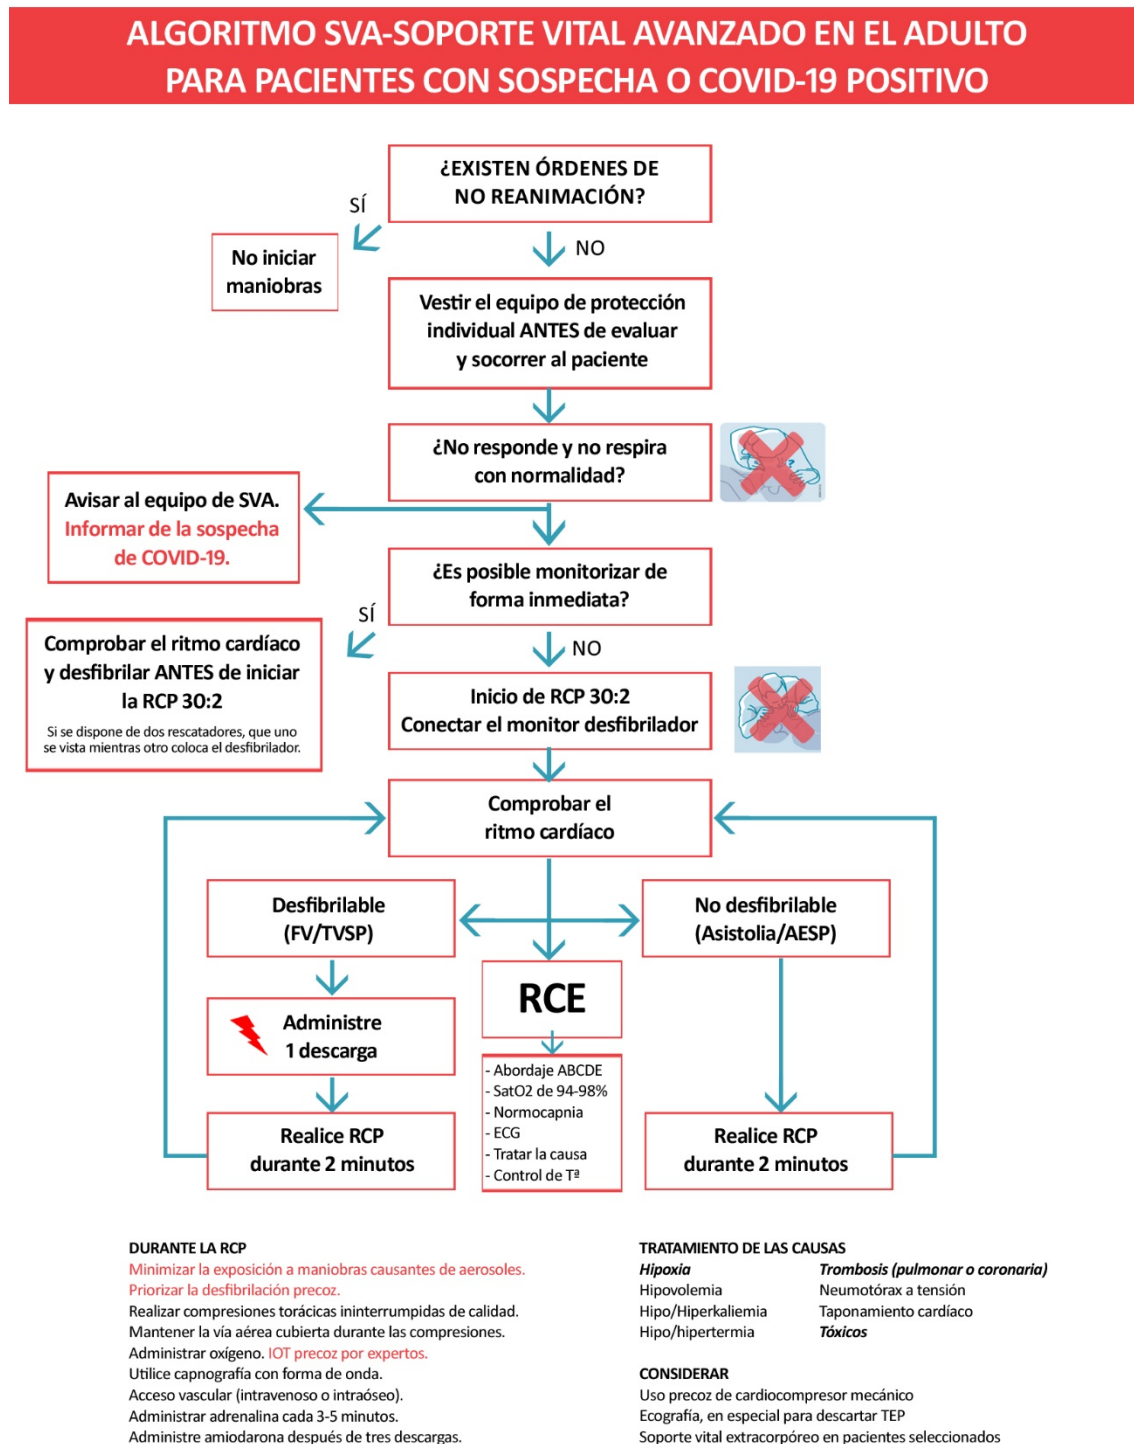

En **rojo**, las adaptaciones del algoritmo adaptado con respecto a SVA general. En **negrita y cursiva**, las causas de PCR predominantes en COVID-19.  
 RCP: Reanimación cardiopulmonar. FV: Fibrilación Ventricular. TVSP: Taquicardia Ventricular sin pulso. AESP: Actividad eléctrica sin pulso. RCE: Recuperación de la circulación espontánea. SatO2: Saturación de oxígeno. ECG: Electrocardiograma. Tª: Temperatura.

Figura 5. Adaptación del algoritmo SVB en edad pediátrica en pacientes con sospecha o infección confirmada por COVID-19

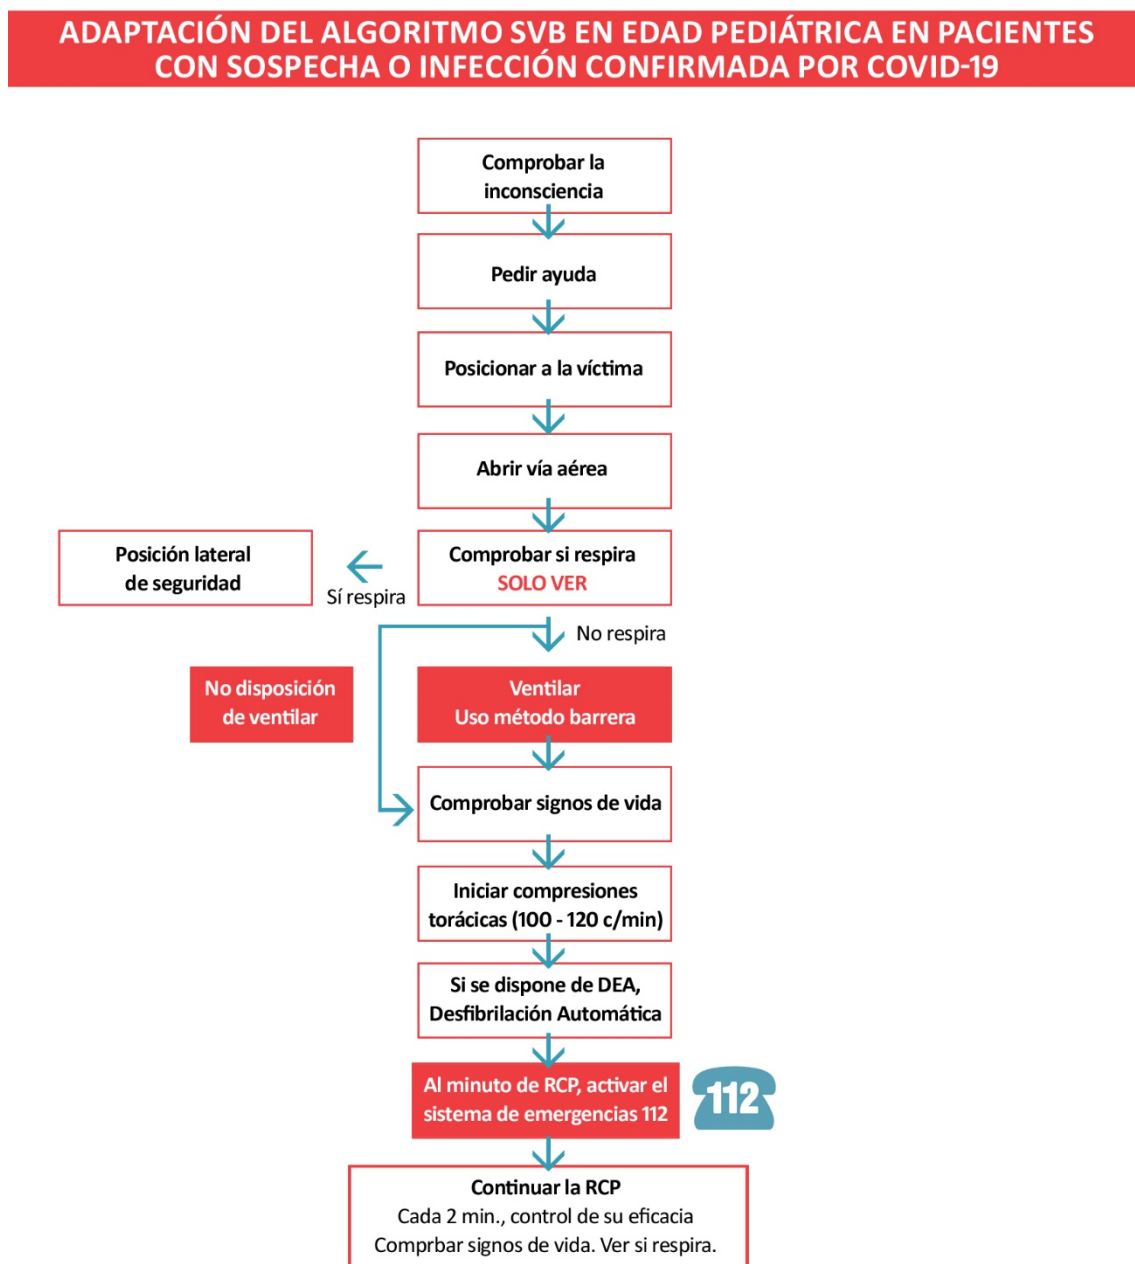

Supplement: mmc1 [file S0210569120301674:mmc1.pdf]
